# Supplementary material
Source: PubMed Central journal article supplement (PMC2040919)

**A** Uniform  $K_D$  Channel in Axon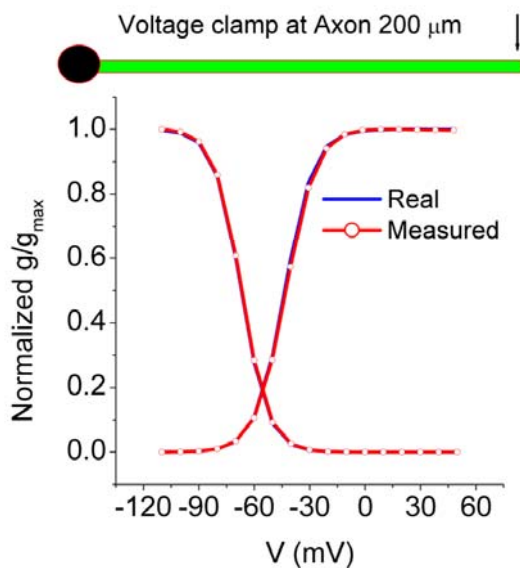**B** Distribution of  $K_D$  Channel in Axon: first 60  $\mu\text{m}$  has 100%; other parts 0%.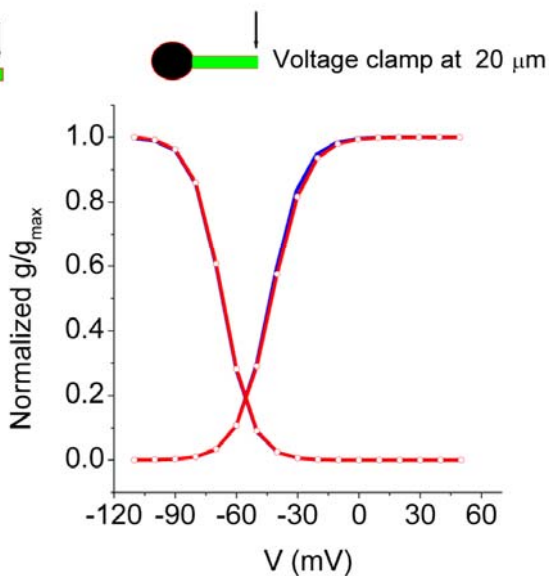**C** Distribution of  $K_D$  Channel in Axon: first 60  $\mu\text{m}$  has 100%; other parts 0%.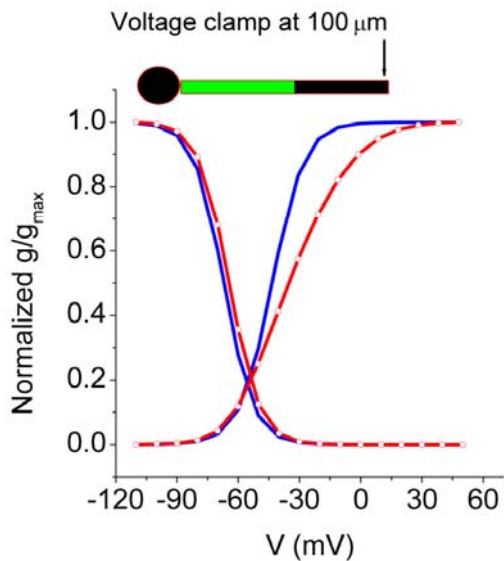**D** Distribution of  $K_D$  Channel in Axon: first 60  $\mu\text{m}$  has 100%; other parts 0%.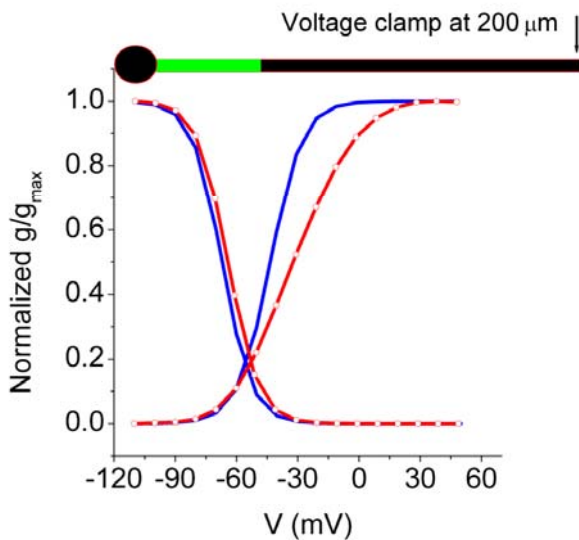

Supplement: pnas_0702041104_3.pdf [file pnas_0702041104_3.pdf]
