# Supplementary material
Source: PubMed Central journal article supplement (PMC2040919)

A

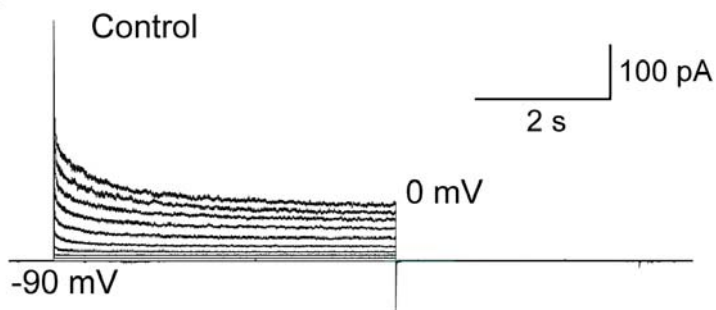

B

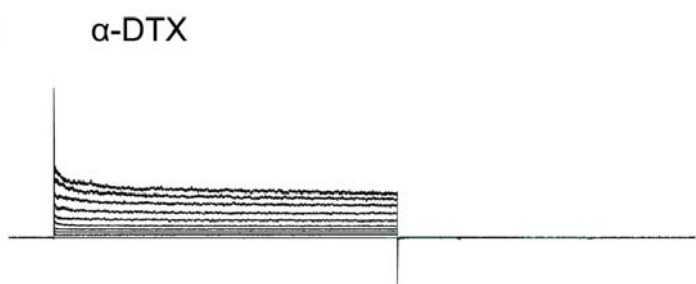

C

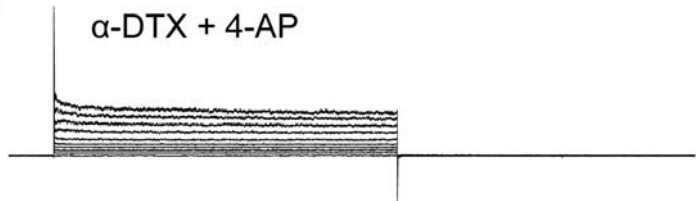

D

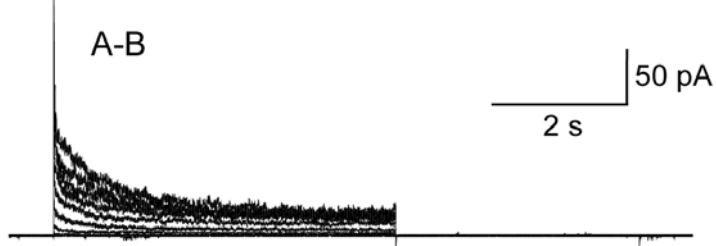

E

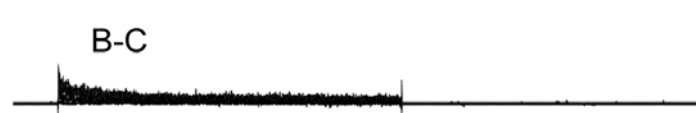

Supplement: pnas_0702041104_1.pdf [file pnas_0702041104_1.pdf]

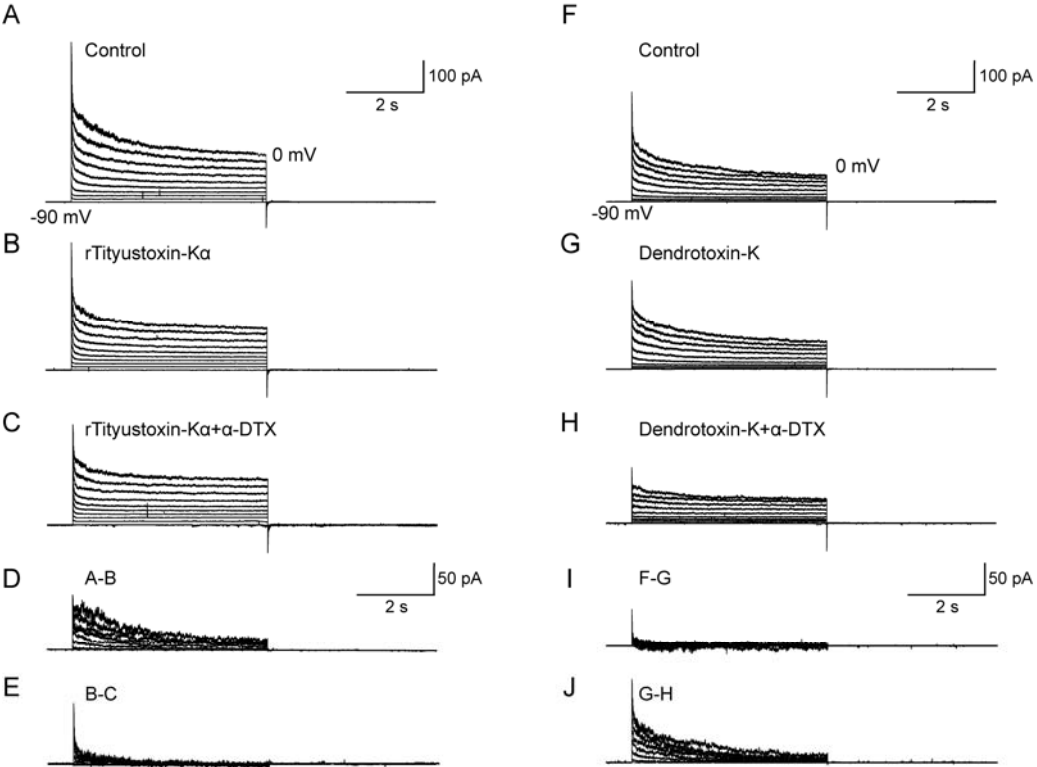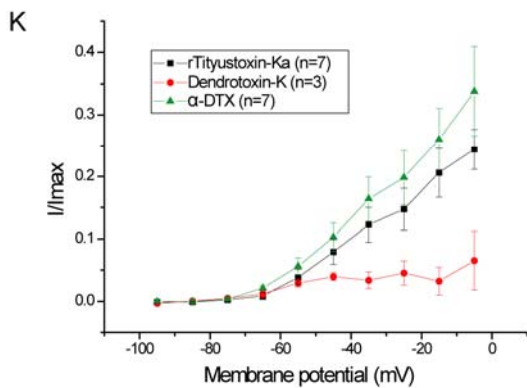

Supplement: pnas_0702041104_2.pdf [file pnas_0702041104_2.pdf]

# Model

Voltage clamp at 200  $\mu\text{m}$

uniform d-current

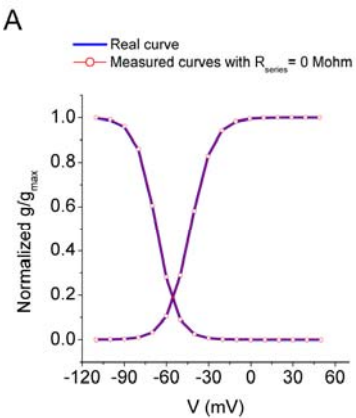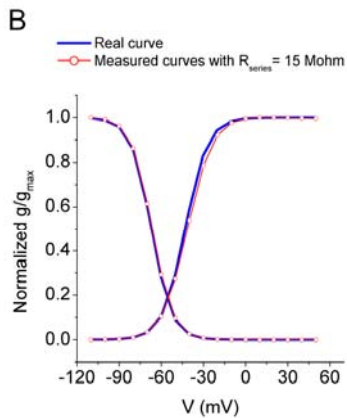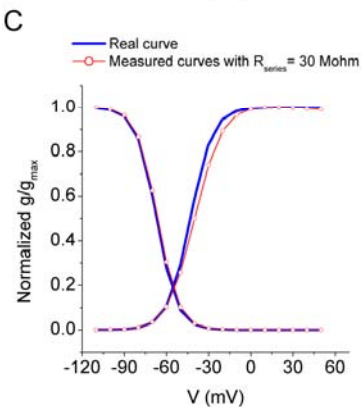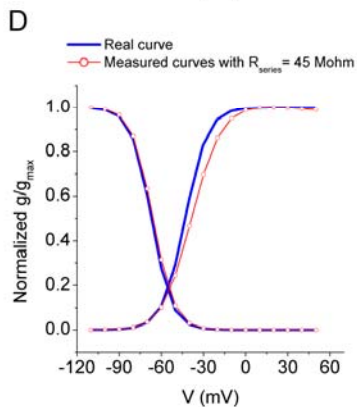

# Neuron

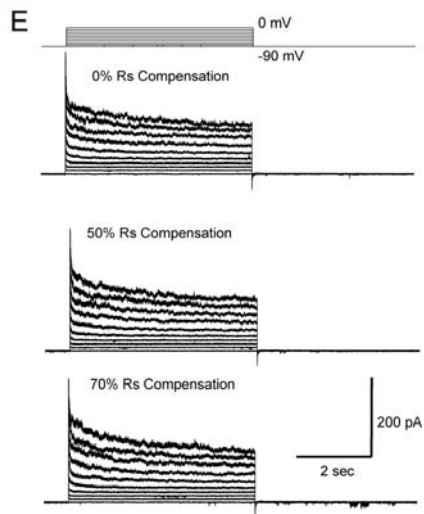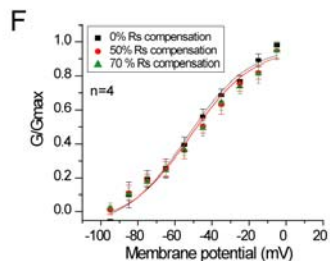

Supplement: pnas_0702041104_4.pdf [file pnas_0702041104_4.pdf]

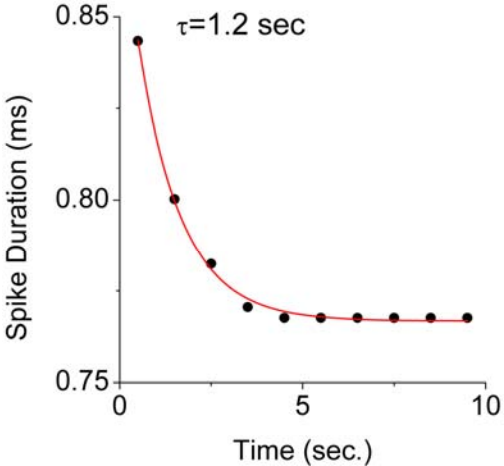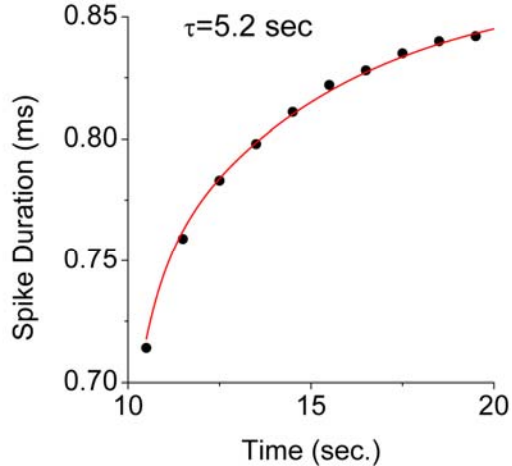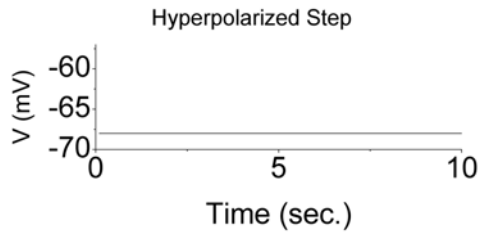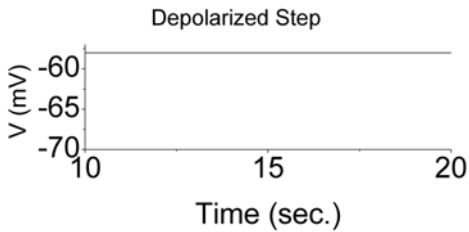

Supplement: pnas_0702041104_5.pdf [file pnas_0702041104_5.pdf]
